# Supplementary material for: In Vitro Human Dermal Absorption Studies on Pesticides in Complex Mixtures: Investigation of Guidance Criteria and Possible Impact Parameters
Source: MDPI journal article supplement (doi:10.3390/toxics12040248), 2024-03-28
Supplement: s1 [file s1]

| Active substance | Tested concentrations [g/L] |       |       | mean % DA |       |       | area dose µg/cm² test |     |     | mean % DA vs. concentration (inverse/non-inverse) |
|------------------|-----------------------------|-------|-------|-----------|-------|-------|-----------------------|-----|-----|---------------------------------------------------|
|                  | 1                           | 2     | 3     | 1         | 2     | 3     | 1                     | 2   | 3   |                                                   |
| Glyphosate       | 346.6                       | 20.8  | 0.06  | 0.48      | 2.72  | 3.81  | 3470                  | 210 | 100 | inverse                                           |
| Cymoxanil        | 47.8                        | 0.6   | 0.06  | 0.98      | 7.52  | 27.65 | 480                   | 10  | 0.6 | inverse                                           |
| Metalaxyl-M      | 514.3                       | 9.8   | 1.06  | 7.61      | 66.58 | 58.5  | 40200                 | 770 | 80  | non-inverse                                       |
| Dimethenamid     | 40                          | 4     | 0.4   | 22.64     | 22.64 | 48.5  | 530                   | 60  | 10  | inverse                                           |
| Pyraclostrobin   | 37.5                        | 7.5   | 1.5   | 25.13     | 21.82 | 20.22 | 380                   | 80  | 20  | non-inverse                                       |
| Picolinafen      | 377                         | 0.508 | 0.13  | 0.81      | 2.72  | 10.93 | 3540                  | 4.8 | 1.2 | inverse                                           |
| Profenofos       | 510.17                      | 2.59  | 0.51  | 5.86      | 27.54 | 36.7  | 40080                 | 210 | 40  | inverse                                           |
| Famoxadone       | 95                          | 7.5   | 0.75  | 9.25      | 27.67 | 55.13 | 2500                  | 190 | 20  | inverse                                           |
| Flusilazole      | 50                          | 5     | 0.5   | 9.27      | 43.43 | 56.5  | 500                   | 50  | 10  | inverse                                           |
| Quinmerac        | 100                         | 1     | 0.38  | 1.31      | 0.99  | 0.92  | 1000                  | 10  | 3.8 | non-inverse                                       |
| Fluoxastrobin    | 100                         | 1.25  | 0.15  | 0.88      | 1.7   | 3.89  | 1                     | 10  | 1.5 | inverse                                           |
| Myclobutanil     | 200                         | 0.48  | 0.048 | 6.37      | 23.9  | 25.95 | 1880                  | 4.9 | 0.5 | inverse                                           |
| Fenhexamid       | 500                         | 5     | 0.375 | 0.11      | 1.07  | 6.71  | 5000                  | 50  | 3.8 | inverse                                           |
| Dimethomorph     | 228.7                       | 1.87  | 0.179 | 2.37      | 5.86  | 16.75 | 2020                  | 20  | 1.8 | inverse                                           |
| Boscalid         | 107.5                       | 1.71  | 0.23  | 0.23      | 1.05  | 3.53  | 1010                  | 20  | 2.1 | inverse                                           |
| Folpet           | 500                         | 7.5   | 1.25  | 0.92      | 17.47 | 14.34 | 5000                  | 80  | 10  | non-inverse                                       |
| Difenoconazole   | 250                         | 1.25  | 0.05  | 1.12      | 12.89 | 15.04 | 2350                  | 10  | 0.5 | inverse                                           |
| Prochloraz       | 270                         | 53.36 | 2.11  | 0.39      | 2.42  | 11.1  | 2700                  | 530 | 20  | inverse                                           |
| Folpet           | 600                         | 7.5   | 1.25  | 0.15      | 14.56 | 10.47 | 6000                  | 80  | 10  | non-inverse                                       |
| Fenpropidin      | 371                         | 3.66  | 0.953 | 2.47      | 47.88 | 50.93 | 3710                  | 40  | 10  | inverse                                           |
| Difenoconazole   | 106                         | 1.05  | 0.263 | 17.37     | 14.48 | 1.06  | 1060                  | 10  | 2.6 | non-inverse                                       |
| Mandipropamid    | 250                         | 0.67  | 0.14  | 0.13      | 0.68  | 1.85  | 2.540                 | 10  | 1.4 | inverse                                           |
| Dimethenamid-P   | 200                         | 5     | 1.25  | 4.21      | 14.9  | 16.12 | 2050                  | 50  | 10  | inverse                                           |
| Glyphosate       | 480                         | 28.7  | 2.4   | 0.17      | 0.27  | 0.83  | 4910                  | 300 | 30  | inverse                                           |
| Pyraclostrobin   | 133.9                       | 2.01  | 0.157 | 0.1       | 2.04  | 8.07  | 1310                  | 20  | 1.7 | inverse                                           |
| Tetraconazole    | 42.3                        | 0.42  | 0.04  | 2.67      | 36.74 | 46.02 | 380                   | 4   | 0.4 | inverse                                           |
| Isopyrazam       | 82.64                       | 0.76  | 0.2   | 2.99      | 59.01 | 71.38 | 800                   | 10  | 2   | inverse                                           |
| Cyproconazole    | 104.83                      | 0.95  | 0.25  | 0.74      | 17.66 | 39.78 | 100                   | 10  | 2.5 | inverse                                           |
| Azoxystrobin     | 104.83                      | 1     | 0.24  | 0.37      | 4.82  | 6.35  | 100                   | 10  | 2.5 | inverse                                           |
| Prosulfocarb     | 620                         | 25    | 8.4   | 8.18      | 34.54 | 46.2  | 6200                  | 250 | 80  | inverse                                           |
| Fluxapyroxad     | 62.5                        | 0.833 | 0.278 | 0.96      | 2.87  | 4.04  | 630                   | 10  | 2.8 | inverse                                           |
| Metconazole      | 45                          | 0.6   | 0.2   | 0.57      | 13.41 | 21.61 | 420                   | 10  | 1.9 | inverse                                           |
| Fluxapyroxad     | 287                         | 19    | 1.84  | 0.74      | 0.4   | 1.04  | 2690                  | 180 | 20  | non-inverse                                       |
| Fenamidone       | 75                          | 1     | 0.375 | 0.4       | 2.13  | 1.18  | 750                   | 10  | 3.8 | non-inverse                                       |
| Propamocarb HCl  | 375                         | 5     | 0.75  | 0.37      | 5.93  | 6.99  | 3750                  | 50  | 10  | inverse                                           |
| Cyproconazole    | 125.73                      | 1.31  | 0.34  | 0.09      | 5.4   | 5.56  | 1230                  | 10  | 3.3 | inverse                                           |
| Isopyrazam       | 83.48                       | 0.62  | 0.18  | 0.27      | 12.7  | 23.32 | 840                   | 10  | 2.1 | inverse                                           |
| Imidacloprid     | 700                         | 2     | 0.07  | 0.1       | 0.49  | 6.94  | 3600                  | 150 | 20  | inverse                                           |
| Fluxapyroxad     | 75                          | 1.12  | 0.2   | 0.26      | 8.22  | 9.5   | 760                   | 10  | 1.9 | inverse                                           |
| Pyraclostrobin   | 150                         | 2.24  | 0.375 | 0.31      | 8.9   | 9.83  | 1410                  | 20  | 4.1 | inverse                                           |
| Isopyrazam       | 125                         | 0.83  | 0.125 | 0.11      | 17.52 | 21.22 | 1320                  | 10  | 1.2 | inverse                                           |
| Azoxystrobin     | 200                         | 1.3   | 0.2   | 0.1       | 5.38  | 16.02 | 2050                  | 10  | 2.1 | inverse                                           |
| Cymoxanil        | 225                         | 0.375 | 0.094 | 0.21      | 10.34 | 20.95 | 2250                  | 3.8 | 0.9 | inverse                                           |
| Difenoconazole   | 114                         | 0.61  | 0.08  | 0.43      | 24.18 | 29.25 | 1140                  | 10  | 0.8 | inverse                                           |
| Isopyrazam       | 122                         | 1.35  | 0.1   | 1.55      | 3.86  | 9.1   | 1220                  | 10  | 1   | inverse                                           |

|                                     |        |       |       |       |       |       |       |      |     |             |
|-------------------------------------|--------|-------|-------|-------|-------|-------|-------|------|-----|-------------|
| Azoxystrobin                        | 200    | 2     | 0.5   | 0.58  | 3.67  | 4.59  | 1910  | 20   | 10  | inverse     |
| Isopyrazam                          | 125    | 1.25  | 0.3   | 0.77  | 5.24  | 3.99  | 1150  | 10   | 3.2 | non-inverse |
| Zoxamide                            | 121    | 1.1   | 0.1   | 0.63  | 6.08  | 5.76  | 1210  | 10   | 1   | non-inverse |
| Isopyrazam                          | 62.5   | 1.25  | 0.3   | 0.42  | 5.4   | 13.73 | 630   | 10   | 3.2 | inverse     |
| Propiconazole                       | 62.5   | 1.25  | 0.3   | 0.91  | 5.18  | 16.93 | 630   | 10   | 3.1 | inverse     |
| Thiophanate-methyl                  | 350    | 0.225 | 0.15  | 0.81  | 16.58 | 17.64 | 3620  | 2.4  | 1.5 | inverse     |
| Tebuconazole                        | 103    | 0.1   | 0.068 | 1.84  | 22.72 | 23.12 | 1050  | 1    | 0.7 | inverse     |
| Dimethomorph                        | 250    | 5     | 0.5   | 2.37  | 3.33  | 10.02 | 2960  | 50   | 10  | inverse     |
| Napropamide                         | 450    | 22.5  | 0.9   | 0.7   | 6.51  | 13.43 | 4500  | 230  | 10  | inverse     |
| Metribuzin                          | 175    | 52.5  | 26.25 | 0.65  | 2.28  | 1.19  | 7000  | 530  | 260 | non-inverse |
| Pymetrozine                         | 163    | 1.05  | 0.259 | 0.05  | 1.19  | 2.27  | 1630  | 1.1  | 0.3 | inverse     |
| Epoxiconazole                       | 62.5   | 1.25  | 0.208 | 0.99  | 9.4   | 47.61 | 630   | 10   | 2.1 | inverse     |
| Fluxapyroxad                        | 62.5   | 1.25  | 0.208 | 1     | 2.7   | 7.98  | 630   | 10   | 2.1 | inverse     |
| Fluopyram                           | 125    | 1.5   | 0.25  | 0.17  | 8.53  | 9.73  | 1160  | 890  | 10  | inverse     |
| Mandipropamid                       | 250    | 1     | 0.125 | 0.09  | 2.6   | 6.05  | 2190  | 10   | 1.2 | inverse     |
| Propiconazole                       | 231    | 0.56  | 0.06  | 34.57 | 23.57 | 33.22 | 2170  | 10   | 0.6 | inverse     |
| Metiram                             | 143    | 20    | 2.6   | 4.15  | 13.55 | 33.11 | 1430  | 200  | 30  | inverse     |
| Metiram                             | 143    | 20    | 2.6   | 4.18  | 13.55 | 33.11 | 1430  | 200  | 30  | inverse     |
| Oxydemeton-methyl                   | 255.5  | 4.26  | 0.44  | 38.42 | 31.43 | 59.09 | 3990  | 70   | 10  | inverse     |
| Metribuzin                          | 186.78 | 41.88 | 3.95  | 7.83  | 21.47 | 84.84 | 1870  | 420  | 40  | inverse     |
| Oxydemeton-methyl                   | 192.5  | 3.7   | 0.38  | 6.22  | 25.4  | 27.07 | 3010  | 60   | 10  | inverse     |
| Methamidophos                       | 600    | 60    | 2     | 3.63  | 12.33 | 37.3  | 9370  | 940  | 30  | inverse     |
| Tolylfluanid                        | 63.8   | 7.1   | 0.68  | 82.58 | 52.38 | 56.9  | 640   | 70   | 10  | non-inverse |
| Quizalofop-P-tefuryl                | 40     | 0.5   | 0.25  | 2.29  | 16.42 | 18.97 | 430   | 10   | 2.7 | inverse     |
| Imidacloprid                        | 200    | 0.7   | 0.07  | 0.3   | 8.04  | 6.01  | 2000  | 10   | 0.7 | non-inverse |
| Aviglycine hydrochloride            | 25     | 2.5   | 0.125 | 1.54  | 0.81  | 1.72  | 250   | 30   | 1.3 | non-inverse |
| Boscalid                            | 100    | 10    | 1     | 2.09  | 21.3  | 66.61 | 810   | 90   | 10  | inverse     |
| Cyproconazole                       | 60     | 1     | 0.12  | 23.87 | 53.11 | 71.82 | 640   | 10   | 1.2 | inverse     |
| Cloquintocet-methyl                 | 12.5   | 1.25  | 0.125 | 0.63  | 12.96 | 43.34 | 1110  | 100  | 10  | inverse     |
| Flusilazole                         | 400    | 50    | 5     | 18.19 | 36.31 | 67.33 | 4000  | 500  | 50  | inverse     |
| Imidacloprid                        | 350    | 70    | 0.5   | 0.04  | 0.11  | 5.01  | 3500  | 700  | 10  | inverse     |
| Trifloxystrobin                     | 131.39 | 18.92 | 3.02  | 27.3  | 3.66  | 5.02  | 10270 | 1480 | 240 | inverse     |
| Dimoxystrobin                       | 30     | 6     | 1.2   | 3.16  | 12.06 | 4.43  | 300   | 60   | 10  | non-inverse |
| Chlorothalonil                      | 745    | 7.44  | 0.92  | 0.1   | 0.61  | 2.25  | 3700  | 40   | 4.6 | inverse     |
| Terbuthylazine                      | 166.65 | 16.67 | 0.51  | 0.32  | 0.34  | 1.12  | 3500  | 500  | 1.2 | inverse     |
| Azoxystrobin                        | 93.5   | 1.039 | 0.134 | 6.1   | 3.1   | 0.17  | 940   | 10   | 1.3 | non-inverse |
| Folpet                              | 500    | 5.5   | 0.7   | 0.43  | 2.34  | 8.8   | 5000  | 60   | 10  | inverse     |
| Cyfluthrin, beta-                   | 80     | 40    | 11.4  | 0.04  | 0.14  | 0.33  | 700   | 390  | 110 | inverse     |
| Epoxiconazole                       | 125    | 1.25  | 0.313 | 1.9   | 11.17 | 11.24 | 1260  | 10   | 3.6 | inverse     |
| Terbuthylazine                      | 326    | 3.75  | 1.63  | 0.94  | 5.78  | 12.52 | 2930  | 40   | 20  | inverse     |
| Metolachlor, S-Bromoxynil octanoate | 326.5  | 8.92  | 2.26  | 35.39 | 27.72 | 1.99  | 3270  | 90   | 20  | non-inverse |
| Diflufenican                        | 327.6  | 4.913 | 1.23  | 0.9   | 7.86  | 7.18  | 3280  | 50   | 10  | inverse     |
| Metribuzin                          | 171    | 1.5   | 0.3   | 0.09  | 5.02  | 9.83  | 1700  | 20   | 3   | inverse     |
| Clothianidin                        | 64     | 0.56  | 0.11  | 0.05  | 12.19 | 19.6  | 630   | 10   | 1.2 | inverse     |
|                                     | 100    | 50    | 11.1  | 0.04  | 0.09  | 1.25  | 830   | 450  | 90  | inverse     |

|                                        |      |       |       |      |       |       |       |       |       |             |
|----------------------------------------|------|-------|-------|------|-------|-------|-------|-------|-------|-------------|
| Clothianidin                           | 600  | 102   | 22.6  | 0.03 | 0.2   | 0.26  | 4990  | 450   | 90    | inverse     |
| Flufenacet                             | 171  | 1.5   | 0.3   | 0.16 | 12.85 | 16.12 | 1640  | 10    | 3     | inverse     |
| Triasulfuron                           | 66.7 | 0.15  | 0.075 | 0.03 | 1.12  | 2.97  | 670   | 1.7   | 0.9   | inverse     |
| Fenoxycarb                             | 250  | 0.75  | 0.05  | 0.53 | 10.53 | 46.35 | 2500  | 10    | 0.5   | inverse     |
| Spirotetramat                          | 150  | 1.5   | 0.05  | 0.24 | 2.68  | 3.8   | 1500  | 20    | 0.5   | inverse     |
| Folpet                                 | 500  | 7.5   | 1.2   | 0.92 | 17.47 | 14.34 | 5000  | 75    | 12.5  | non-inverse |
| Flupyradifurone                        | 200  | 0.625 | 0.1   | 0.2  | 1.99  | 4.73  | 2000  | 6.3   | 1     | inverse     |
| Sedaxane                               | 500  | 25    | 2.5   | 0.07 | 0.55  | 0.57  | 5000  | 250   | 25    | inverse     |
| Dimethazone<br>(Command,<br>Clomazone) | 360  | 2.44  | 0.09  | 0.6  | 11.35 | 18.39 | 3600  | 24.4  | 0.9   | inverse     |
| Isopyrazam                             | 100  | 1     | 0.25  | 0.74 | 15.93 | 39.72 | 1000  | 10    | 2.5   | inverse     |
| Spirotetramat                          | 100  | 0.75  | 0.075 | 0.05 | 1.98  | 5.23  | 1000  | 7.5   | 0.8   | inverse     |
| Difenoconazole                         | 125  | 0.625 | 0.083 | 0.45 | 24.25 | 29.4  | 1250  | 6.3   | 0.8   | inverse     |
| Prothioconazole                        | 100  | 1.25  | 0.25  | 4.68 | 16.74 | 27.26 | 1000  | 12.5  | 2.5   | inverse     |
| Glyphosate                             | 360  | 36    | 2.2   | 0.06 | 0.18  | 0.05  | 3600  | 360   | 22    | non-inverse |
| Imazalil                               | 25   | 16.7  | 12.5  | 2.7  | 3.4   | 4.37  | 250   | 167   | 125   | inverse     |
| Fluxapyroxad                           | 75   | 0.5   | 0.25  | 0.61 | 0.78  | 1.29  | 750   | 5     | 2.5   | inverse     |
| Difenoconazole                         | 50   | 0.33  | 0.167 | 1.11 | 6.15  | 8.88  | 500   | 3.3   | 1.7   | inverse     |
| Iprovalicarb                           | 90   | 1.2   | 0.07  | 0.21 | 2.6   | 10.84 | 450   | 12    | 0.7   | inverse     |
| Pyrimethanil                           | 336  | 2.688 | 0.538 | 0.12 | 11.92 | 38.17 | 94915 | 759.3 | 151.9 | inverse     |
| Napropamide                            | 450  | 22.5  | 0.9   | 0.7  | 6.51  | 13.43 | 4500  | 225   | 9     | inverse     |
| Cyantraniliprole                       | 200  | 0.749 | 0.25  | 0.01 | 0.2   | 0.27  | 2000  | 7.5   | 2.5   | inverse     |
| Mandipropamid                          | 250  | 1     | 0.125 | 0.09 | 2.6   | 5.81  | 2500  | 10    | 1.3   | inverse     |
| Difenoconazole                         | 125  | 0.625 | 0.083 | 0.45 | 24.25 | 29.4  | 1250  | 6.3   | 0.8   | inverse     |
| Isopyrazam                             | 125  | 1.25  | 0.313 | 0.47 | 11.5  | 17.29 | 1250  | 12.5  | 3.1   | inverse     |
| Spinetoram                             | 25   | 0.25  | 0.025 | 1.08 | 3.59  | 6.01  | 250   | 2.5   | 0.3   | inverse     |
| Trifloxystrobin                        | 250  | 0.2   | 0.033 | 0.03 | 0.58  | 9.98  | 2500  | 2     | 0.3   | inverse     |
| Flufenacet                             | 500  | 1.2   | 0.25  | 0.18 | 4.19  | 21.71 | 5000  | 12    | 2.5   | inverse     |
| Fludioxonil                            | 250  | 0.83  | 0.125 | 0.03 | 3     | 5.95  | 2500  | 8.3   | 1.3   | inverse     |
